# Supplementary material
Source: publisher figshare collection journal article supplement (https://sage.figshare.com/ndownloader/files/18599039)
Supplement: Supplementary file 1 [file 18599039]

---

## Supplementary Material

### Contents:

Table S1 The detailed search strategy in Embase

Table S2 The detailed search strategy in PubMed

Table S3 The detailed search strategy in Cochrane Library

Table S4 The list of excluded studies in the process of full text screening

Table S5 Risk of bias assessment for RCTs included

Table S6 The quality assessment of cohort studies included(NOS)

Table S7 Definitions and attainment of target trough serum concentrations

Table S8 Definitions and occurrence of nephrotoxicity

Figure S1 Subgroup analysis for individualized dosing via PK tool and attainment of target trough concentration: A, Mode of individualization; B, Utility of Bayesian forecasting method; C, Age; D, Whether patients were critically ill or not; E, Target trough concentration; F, Study design.

Figure. S2. Sub-analysis of target trough concentration in accordance with guidelines

Figure. S3. Sub-analysis of nephrotoxicity's definition in accordance with guidelines

Figure S4 Meta-analysis for all-cause mortality

Figure S5 Meta-analysis for length of hospital-stay

Figure S6 Sensitivity analysis using function "metaninf": A, Attainment of target trough concentration; B, Nephrotoxicity; C, Mortality; D, Length of hospital-stay

Figure S7 Funnel plot for publication bias assessment: A, Attainment of target trough concentration; B, Nephrotoxicity.

Figure S8 Egger's test for publication bias assessment: A, Attainment of target trough concentration; B, Nephrotoxicity.

Figure S9 Trim and fill analysis for attainment of target trough concentration

### Table S1. The detailed search strategy in Embase

| No. | Search terms                                                                  |
|-----|-------------------------------------------------------------------------------|
| #1  | vancomycin:ab,ti                                                              |
| #2  | population /exp OR population AND (pharmacokinetics /exp OR pharmacokinetics) |
| #3  | population /exp OR population AND (pharmacokinetic /exp OR pharmacokinetic)   |
| #4  | PPK                                                                           |
| #5  | bayes                                                                         |
| #6  | bayesian/exp OR bayesian                                                      |
| #7  | monte AND carlo                                                               |
| #8  | pharmacist/exp OR pharmacist                                                  |

|     |                                                                                 |
|-----|---------------------------------------------------------------------------------|
| #9  | TDM                                                                             |
| #10 | therapeutic AND (drug /exp OR drug) AND (monitoring /exp OR monitoring)         |
| #11 | patient specific                                                                |
| #12 | patient tailored                                                                |
| #13 | individualiz*                                                                   |
| #14 | individualis*                                                                   |
| #15 | #2 OR #3 OR #4 OR #5 OR #6 OR #7 OR #8 OR #9 OR #10 OR #11 OR #12 OR #13 OR #14 |
| #16 | #1 AND #15                                                                      |

**Table S2. The detailed search strategy in PubMed**

| No  | Search terms                                                                             |
|-----|------------------------------------------------------------------------------------------|
| #1  | vancomycin:ab,ti                                                                         |
| #2  | Population pharmacokinetic                                                               |
| #3  | Population pharmacokinetics                                                              |
| #4  | PPK                                                                                      |
| #5  | Monte Carlo                                                                              |
| #6  | bayes                                                                                    |
| #7  | bayesian                                                                                 |
| #8  | pharmacist                                                                               |
| #9  | TDM                                                                                      |
| #10 | therapeutic drug monitoring                                                              |
| #11 | patient-specific                                                                         |
| #12 | patient-tailored                                                                         |
| #13 | individualise*                                                                           |
| #14 | individualize*                                                                           |
| #15 | #1 AND (#2 OR #3 OR #4 OR #5 OR #6 OR #7 OR #8 OR #9 OR #10 OR #11 OR #12 OR #13 OR #14) |

**Table S3. The detailed search strategy in The Cochrane Library**

| No. | Search terms                  |
|-----|-------------------------------|
| #1  | VANCOMYCIN:ti,ab,kw in Trials |
| #2  | Population pharmacokinetics   |
| #3  | population pharmacokinetic    |
| #4  | PPK                           |
| #5  | bayes                         |

---

|     |                                                                                 |
|-----|---------------------------------------------------------------------------------|
| #6  | bayesian                                                                        |
| #7  | Monte Carlo                                                                     |
| #8  | pharmacist                                                                      |
| #9  | TDM                                                                             |
| #10 | therapeutic drug monitoring                                                     |
| #11 | patient-specific                                                                |
| #12 | patient-tailored                                                                |
| #13 | individualized                                                                  |
| #14 | individualised                                                                  |
| #15 | #2 or #3 or #4 or #5 or #6 or #7 or #8 or #9 or #10 or #11 or #12 or #13 or #14 |
| #16 | #1 and #15                                                                      |

Table S4 The list of excluded studies in the process of full text screening

| No. | Author (year) | Title                                                                                                                                                                                 | Journal                                                          | Reason for exclusion                                    | Note                                                                        |
|-----|---------------|---------------------------------------------------------------------------------------------------------------------------------------------------------------------------------------|------------------------------------------------------------------|---------------------------------------------------------|-----------------------------------------------------------------------------|
| 1   | 2019          | Optimizing individualized dosing regimen of vancomycin based on JPKD-vancomycin Population pharmacokinetic software and clinical application in patients of augmented renal clearance | Cochrane Central Register of Controlled Trials                   | insufficient clinical data                              | study protocol for registry                                                 |
| 2   | Bai 2015      | Role of Clinical Pharmacist Intervention in Therapeutic Drug Monitoring of Vancomycin                                                                                                 | Chinese Journal of Pharmacovigilance                             | insufficient clinical data                              | the details of pharmacists intervention was not reported                    |
| 3   | Berthaud 2018 | Early Bayesian dose adjustment of vancomycin in children: a randomized controlled trial                                                                                               | Fundamental & clinical pharmacology Journal: Conference Abstract | insufficient clinical data                              | conference abstract without the detail of intervention                      |
| 4   | Bond 2005     | Clinical and economic outcomes of pharmacist-managed aminoglycoside or vancomycin therapy                                                                                             | American Journal of Health-System Pharmacy                       | inappropriate interventions or comparisons              | the intervention was not individualized dosing via pharmacokinetic tool     |
| 5   | Broeker 2019  | Towards precision dosing of vancomycin: a systematic evaluation of pharmacometric models for Bayesian forecasting                                                                     | Clin Microbiol Infect                                            | external validity of a nomogram or population PK model. |                                                                             |
| 6   | Carreno 2017  | Evaluation of a Bayesian Approach to Estimate Vancomycin Exposure in Obese Patients with Limited Pharmacokinetic Sampling: A Pilot Study                                              | Antimicrob Agents Chemother                                      | inappropriate interventions or comparisons              | the comparison of different pharmacokinetic methods                         |
| 7   | Chen 2018     | Analysis of clinical administration behavior of vancomycin under clinical pharmacy intervention                                                                                       | Chinese Journal of Drug Application and Monitoring               | inappropriate interventions or comparisons              | pharmacists intervention did not target at individualized vancomycin dosing |

| No. | Author (year) | Title                                                                                                                                                          | Journal                                    | Reason for exclusion                                    | Note                                                                        |
|-----|---------------|----------------------------------------------------------------------------------------------------------------------------------------------------------------|--------------------------------------------|---------------------------------------------------------|-----------------------------------------------------------------------------|
| 8   | Drofenik 2012 | Effect of pharmacy-guided TDM of vancomycin on achieving and maintaining recommended drug levels                                                               | International Journal of Clinical Pharmacy | single-arm study                                        |                                                                             |
| 9   | Duffy 2012    | Vancomycin in newborns: Comparison of a standard dose to dosing adjusted for birth gestation and age                                                           | Archives of Disease in Childhood           | inappropriate interventions or comparisons              | the intervention was not individualized dosing via pharmacokinetic tool     |
| 10  | Emoto 2017    | Vancomycin dynamic PBPK modeling to assess pharmacokinetic profiles associated with changes in multiple physiological parameters                               | Clinical Pharmacology and Therapeutics     | insufficient clinical data                              | conference abstract                                                         |
| 11  | Fang 2017     | Study on the optimization of dosage regimen of vancomycin                                                                                                      | Pharmaceutical Care and Research           | single-arm study                                        |                                                                             |
| 12  | Foral 2017    | A novel vancomycin standardized calculations method achieved therapeutic trough goals in obese and non-obese patients in a veterans affairs health care system | Open Forum Infectious Diseases             | insufficient clinical data                              | conference abstract without the description of detailed calculation method  |
| 13  | Giraud 2010   | Vancomycin dose regimen adjustment in burn patients according to total burn surface area                                                                       | Intensive Care Medicine                    | inappropriate interventions or comparisons              | the intervention was not individualized dosing via pharmacokinetic tool     |
| 14  | Hahn 2015     | Validation of a pediatric population pharmacokinetic model for vancomycin                                                                                      | Ther Drug Monit                            | external validity of a nomogram or population PK model. |                                                                             |
| 15  | Hanretty 2016 | Assessing the impact of a pharmacist-managed vancomycin protocol on the duration of empiric therapy                                                            | Open Forum Infectious Diseases             | inappropriate interventions or comparisons              | pharmacists intervention did not target at individualized vancomycin dosing |

| No. | Author (year)       | Title                                                                                                                                                                  | Journal                          | Reason for exclusion                                    | Note                                                                                       |
|-----|---------------------|------------------------------------------------------------------------------------------------------------------------------------------------------------------------|----------------------------------|---------------------------------------------------------|--------------------------------------------------------------------------------------------|
| 16  | Hong 2015           | Individualized vancomycin dosing in obese patients: a two-sample measurement approach improves target attainment                                                       | Pharmacotherapy                  | inappropriate interventions or comparisons              | both groups adopted pharmacokinetic tool, two sample measurement versus trough-only dosing |
| 17  | Igarashi 2000       | Individualization of vancomycin therapy                                                                                                                                | Japanese Journal of Chemotherapy | single-arm study                                        |                                                                                            |
| 18  | Imaura 2011         | Effect of pharmacists intervention on the antibiotic therapy for the methicillin-resistant Staphylococcus aureus (MRSA) infectious diseases in the intensive care unit | Yakugaku Zasshi                  | neither English nor Chinese literature                  |                                                                                            |
| 19  | Janoly-Dumenil 2003 | Interest of bayesian forecasting of vancomycin dosing regimens in a neonatal intensive care unit                                                                       | Journal de Pharmacie Clinique    | insufficient clinical data                              | the outcome of interest was not reported                                                   |
| 20  | Juan 2008           | Design and validation of a dosing algorithm for vancomycin in premature neonates                                                                                       | An Pediatr (Barc)                | external validity of a nomogram or population PK model. |                                                                                            |
| 21  | Kouroggi 2017       | Establishment of a new initial dose plan for vancomycin using the generalized linear mixed model                                                                       | Theor Biol Med Model             | inappropriate interventions or comparisons              | the comparison of different pharmacokinetic methods                                        |
| 22  | Lee 2016            | Evaluation of a pharmacy directed vancomycin and monitoring pilot program at an academic pediatric hospital                                                            | Open Forum Infectious Diseases   | insufficient clinical data                              | conference abstract without the description of pharmacy driven vancomycin dosing           |
| 23  | Lerous 2016         | Clinical Utility and Safety of a Model-Based Patient-Tailored Dose of Vancomycin in Neonates                                                                           | Antimicrob Agents Chemother      | single-arm study                                        |                                                                                            |

| No. | Author (year)         | Title                                                                                                                                                     | Journal                                       | Reason for exclusion                                    | Note                                                                                                |
|-----|-----------------------|-----------------------------------------------------------------------------------------------------------------------------------------------------------|-----------------------------------------------|---------------------------------------------------------|-----------------------------------------------------------------------------------------------------|
| 24  | Li 2019               | Study on Application of JPKD Population Pharmacokinetics Software in Individualized Administration of Vancomycin                                          | Anti-Infection Pharmacy                       | single-arm study                                        |                                                                                                     |
| 25  | Liang 2015            | A cohort study of vancomycin therapeutic drug monitoring                                                                                                  | Chinese Journal of Infection and Chemotherapy | insufficient clinical data                              | the detail of TDM based dosed adjustment was not provided                                           |
| 26  | Lin 2016              | Population pharmacokinetics of vancomycin in adult Chinese patients with post-craniotomy meningitis and its application in individualised dosage regimens | Eur J Clin Pharmacol                          | external validity of a nomogram or population PK model. |                                                                                                     |
| 27  | Mahmoud 2017          | Optimization of therapeutic drug monitoring of vancomycin in patients with chronic hemodialysis                                                           | Clin Nephrol                                  | inappropriate interventions or comparisons              | the intervention was not individualized dosing via pharmacokinetic tool                             |
| 28  | Marquis 2015          | Evaluation of a Pharmacist-Directed Vancomycin Dosing and Monitoring Pilot Program at a Tertiary Academic Medical Center                                  | Ann Pharmacother                              | insufficient clinical data                              | the details of pharmacists intervention were not described                                          |
| 29  | Masoumi 2017          | Evaluation of pharmacist intervention on vancomycin dosing and nephrotoxicity prevention                                                                  | European Journal of Hospital Pharmacy         | inappropriate interventions or comparisons              | the pharmacist intervention did not target at pharmacokinetic interpretation of serum concentration |
| 30  | Medellin-Garibay 2016 | Pharmacokinetics of vancomycin and dosing recommendations for trauma patients                                                                             | J Antimicrob Chemother                        | external validity of a nomogram or population PK        |                                                                                                     |

| No. | Author (year)  | Title                                                                                                                                                     | Journal                               | Reason for exclusion                                    | Note                                                                                                               |
|-----|----------------|-----------------------------------------------------------------------------------------------------------------------------------------------------------|---------------------------------------|---------------------------------------------------------|--------------------------------------------------------------------------------------------------------------------|
|     |                |                                                                                                                                                           |                                       | model.                                                  |                                                                                                                    |
| 31  | Mochizuki 2010 | Efficacy and safety for vancomycin in uncomplicated catheter-related bloodstream infection by coagulase negative Staphylococcus                           | Japanese Journal of Chemotherapy      | inappropriate interventions or comparisons              | the intervention was not individualized dosing via pharmacokinetic tool                                            |
| 32  | Moreno 2016    | Impact of a bayesian pharmacokinetic dosing programme of vancomycin on clinical outcomes                                                                  | European Journal of Hospital Pharmacy | single-arm study                                        |                                                                                                                    |
| 33  | OBrien 2015    | Evaluation of the safety of a vancomycin nomogram used to achieve target trough concentrations                                                            | Hospital Pharmacy                     | inappropriate interventions or comparisons              | the intervention was not individualized dosing via pharmacokinetic tool                                            |
| 34  | Okada 2016     | Clinical Evaluation of Pharmacist Interventions in Patients Treated with Anti-methicillin-Resistant Staphylococcus aureus Agents in a Hematological Ward  | Biol Pharm Bull                       | insufficient clinical data                              | the outcomes of vancomycin dosing could not be substracted                                                         |
| 35  | Olson 2019     | Optimizing Vancomycin Dosing in Chronic Kidney Disease by Deriving and Implementing a Web-Based Tool Using a Population Pharmacokinetics Analysis         | J Pediatric Infect Dis Soc            | inappropriate interventions or comparisons              | the intervention was not restricted to the pharmacokinetic intepretation of vancomycin, but also the timing of TDM |
| 36  | Radke 2016     | Development of a Physiologically Based Pharmacokinetic Modelling Approach to Predict the Pharmacokinetics of Vancomycin in Critically Ill Septic Patients | Clin Pharmacokinet                    | external validity of a nomogram or population PK model. |                                                                                                                    |



| No. | Author (year) | Title                                                                                                                                                               | Journal                                    | Reason for exclusion                                    | Note                                                                          |
|-----|---------------|---------------------------------------------------------------------------------------------------------------------------------------------------------------------|--------------------------------------------|---------------------------------------------------------|-------------------------------------------------------------------------------|
| 37  | Robinson 2016 | Effectiveness of a pharmacist to dose vancomycin consult service in attaining therapeutic trough levels in a teaching hospital                                      | Pharmacotherapy                            | insufficient clinical data                              | the details of pharmacist to dose vancomycin consult service was not reported |
| 38  | Romero 2017   | Comparison of area under the curve estimated between a prediction mathematical method versus Bayesian bicompartimental model                                        | International Journal of Clinical Pharmacy | inappropriate interventions or comparisons              | the comparison of different pharmacokinetic methods                           |
| 39  | Romero 2018   | Could a Bayesian bicompartimental model be equivalent to a prediction mathematical method to estimate trough values for vancomycin monitoring?                      | International Journal of Clinical Pharmacy | inappropriate interventions or comparisons              | the comparison of different pharmacokinetic methods                           |
| 40  | Roux 1992     | Vancomycin drug monitoring: Computerized Bayesian method                                                                                                            | Journal de Pharmacie Clinique              | external validity of a nomogram or population PK model. |                                                                               |
| 41  | Sanchez 2016  | Clinical impact of pharmacist intervention in therapeutic vancomycin monitoring                                                                                     | European Journal of Hospital Pharmacy      | insufficient clinical data                              | the pathway of intervention was not provided                                  |
| 42  | Sato 2007     | Evaluation of the usefulness of vancomycin dosage design based on pharmacokinetics/pharmacodynamics theory                                                          | Japanese Journal of Chemotherapy           | inappropriate interventions or comparisons              | the intervention was not individualized dosing via pharmacokinetic tool       |
| 43  | Shankar 2009  | Pharmacist managed vancomycin serum level monitoring leads to improved achievement of therapeutic target levels in children in pediatric intensive care unit (PICU) |                                            | insufficient clinical data                              | the details of pharmacokinetic modeling process were not reported             |
| 44  | Shao 2014     | Influence of Effect of Vancomycin by Pharmaceutical Care in Patients with Severe Pneumonia Complicated with Acute                                                   | Chin J Pharmacoepidemiol                   | insufficient clinical data                              | the details of individualized dosing were not reported                        |

| No. | Author (year)  | Title                                                                                                                                                                                     | Journal                                  | Reason for exclusion                                    | Note                                                                                                          |
|-----|----------------|-------------------------------------------------------------------------------------------------------------------------------------------------------------------------------------------|------------------------------------------|---------------------------------------------------------|---------------------------------------------------------------------------------------------------------------|
|     |                | Renal Injury                                                                                                                                                                              |                                          |                                                         |                                                                                                               |
| 45  | Shi 2018       | Relationship between vancomycins blood concentration monitoring and clinical outcomes in critically ill patients                                                                          | Practical Pharmacy and Clinical Remedies | inappropriate interventions or comparisons              | the intervention group targeted at TDM, rather than the pharmacokinetic interpretation to serum concentration |
| 46  | Smith 2016     | Impact of a Pharmacist-Initiated Vancomycin Monitoring Program                                                                                                                            | Consult Pharm                            | inappropriate interventions or comparisons              | pharmacists intervention did not target at pharmacokinetic interpretation to serum concentrations             |
| 47  | Stockmann 2015 | Predictive Performance of a Vancomycin Population Pharmacokinetic Model in Neonates                                                                                                       | Infect Dis Ther                          | external validity of a nomogram or population PK model. |                                                                                                               |
| 48  | Suardi 2016    | Individualized dose of Vancomycin for Patients with Chronic Kidney Disease at a Government Hospital in Padang, West Sumatra, Indonesia                                                    | Der Pharmacia Lettre                     | insufficient clinical data                              | the detail of the intervention was not provided                                                               |
| 49  | Sussman 2013   | Evaluation of a pharmacist managed vancomycin therapy compared to physician managed dosing in establishing timely and therapeutic vancomycin serum concentrations at a community hospital | Journal of Pharmacy Practice             | insufficient clinical data                              | the detail of pharmacist managed vancomycin therapy was not provided                                          |

| No. | Author (year)         | Title                                                                                                                                        | Journal                               | Reason for exclusion                                    | Note                                                                                         |
|-----|-----------------------|----------------------------------------------------------------------------------------------------------------------------------------------|---------------------------------------|---------------------------------------------------------|----------------------------------------------------------------------------------------------|
| 50  | Taghizadeh-Ghehi 2015 | Predictive performance of Vancomycin population pharmacokinetic models in Iranian patients underwent hematopoietic stem cell transplantation | J Res Pharm Pract                     | external validity of a nomogram or population PK model. |                                                                                              |
| 51  | Takahashi 1998        | Clinical evaluation of vancomycin dosage regimens based on the Bayesian method                                                               | Japanese Journal of Chemotherapy      | single-arm study                                        |                                                                                              |
| 52  | Takahashi 2018        | The effects of intervention by a ward pharmacist on vancomycin blood level control in the emergency medical center                           | Intensive Care Medicine Experimental  | inappropriate interventions or comparisons              | the detailed intervention by pharmacists were not mentioned                                  |
| 53  | Xu 2018               | Research of optimal dosing regimens and therapeutic drug monitoring for vancomycin by clinical pharmacists: analysis of 7-year data          | Chin Crit Care Med                    | inappropriate interventions or comparisons              | the intervention of pharmacokinetic dosing was not mentioned                                 |
| 54  | Xu 2018               | Research of optimal dosing regimens and therapeutic drug monitoring for vancomycin by clinical pharmacists: analysis of 7-year data          | Zhonghua Wei Zhong Bing Ji Jiu Yi Xue | repeptitive data                                        | the study was included in the second round of study selection for two times and was excluded |

---

**Table S5 Risk of bias assessment for RCTs included**

|                | Random sequence generation | Allocation concealment | Blinding of participants and personnel | Blinding of outcome assessment | Incomplete outcome data | Selective reporting | Other bias |
|----------------|----------------------------|------------------------|----------------------------------------|--------------------------------|-------------------------|---------------------|------------|
| Fernandez 1996 | Low risk                   | Low risk               | High risk                              | High risk                      | Low risk                | Unclear             | Unclear    |
| Pea 2002       | Unclear                    | Unclear                | High risk                              | Low risk                       | Low risk                | Unclear             | Unclear    |
| Shahrami 2016  | Low risk                   | Low risk               | Low risk                               | Low risk                       | Low risk                | Unclear             | Unclear    |



---

|                  |   |   |   |   |    |   |   |   |   |
|------------------|---|---|---|---|----|---|---|---|---|
| Irikura (2011)   | ☆ | ☆ | ☆ | ☆ | ☆  | ☆ | ☆ | ☆ | 8 |
| Miller (2018)    | ☆ | ☆ | ☆ | ☆ | ☆  | ☆ | ☆ | ☆ | 8 |
| Welty<br>(1994)  | ☆ | ☆ | ☆ | ☆ | ☆  | ☆ | ☆ | ☆ | 8 |
| Komoto (2018)    | ☆ | ☆ | ☆ | ☆ | ☆☆ | ☆ | ☆ | ☆ | 9 |
| Abulfathi (2018) | ☆ | ☆ | ☆ | ☆ | ☆  | ☆ | ☆ | ☆ | 8 |
| Neely (2018)     | ☆ | ☆ | ☆ | ☆ | ☆  | ☆ | ☆ | ☆ | 8 |
| Dorajoo (2019)   | ☆ | ☆ | ☆ | ☆ | ☆☆ | ☆ | ☆ | ☆ | 9 |
| Truong (2018)    | ☆ | ☆ | ☆ | ☆ | ☆  | ☆ | ☆ | ☆ | 8 |
| Finch (2017)     | ☆ | ☆ | ☆ | ☆ | ☆☆ | ☆ | ☆ | ☆ | 9 |

Table S7. Definitions and attainment of target trough serum concentrations

| Study              | Definition                                                                                                                             | Intervention group |       | Control group    |       |
|--------------------|----------------------------------------------------------------------------------------------------------------------------------------|--------------------|-------|------------------|-------|
|                    |                                                                                                                                        | Number of events   | Total | Number of events | Total |
| Brinkman (2015)    | Initial (< 48 hours) trough levels of > 15 mg/l                                                                                        | 9                  | 15    | 4                | 14    |
| Cardile (2015)     | National guideline targets of 10–15 or 15–20 mg/L according to treatment indication.                                                   | 53                 | 66    | 33               | 79    |
| Crumby (2009)      | Steady-state trough concentrations were within 5-15 mg/L                                                                               | 32                 | 39    | 54               | 108   |
| Grimsley (1999)    | A first therapeutic drug monitoring serum vancomycin concentration within 5-12 mg/L                                                    | 18                 | 25    | 40               | 122   |
| Hirano (2016)      | Steady state serum concentration within 10-20 mg/L                                                                                     | 43                 | 51    | 11               | 28    |
| Irikura (2011)     | Serum trough concentration of vancomycin at steady state within 5–15 mg/L                                                              | 18                 | 22    | 20               | 41    |
| Leu (2012)         | Trough target was at 5–15 mg/L and 15–20 mg/L according to indications                                                                 | 28                 | 43    | 18               | 56    |
| Masuda (2015)      | 10 – 20 µg/mL therapeutic trough concentration range                                                                                   | 64                 | 102   | 212              | 508   |
| Miller (2018)      | 10–15 mg/L or 15–20 mg/L specified by physicians (at 7 days)                                                                           | 16                 | 16    | 20               | 35    |
| Momattin (2015)    | Therapeutic trough levels were within 10–20 mg/L                                                                                       | 227                | 286   | 137              | 278   |
| Pea (2002)         | Average vancomycin C <sub>min</sub> within 5-10 mg/L                                                                                   | 16                 | 16    | 9                | 16    |
| Shahrami, B.(2016) | Trough serum concentrations not less than 15 mg/L at steady state                                                                      | 9                  | 10    | 3                | 8     |
| Zhao (2013)        | Serum vancomycin concentrations within the therapeutic range of 15–25 mg/l                                                             | 41                 | 58    | 48               | 116   |
| Abulfathi 2018     | Trough concentration; 10–20 mg/L for intermittent infusion, and average steady-state concentration; 17–29 mg/L for continuous infusion | 118                | 217   | 130              | 292   |
| Komoto 2018        | The target VCM trough concentration was set at 10–20 µg/mL (first trough)                                                              | 18                 | 28    | 20               | 49    |
| Truong 2018        | achieving a goal trough concentration (10 to 20 mg/L) at any point during vancomycin therapy                                           | 42                 | 50    | 28               | 50    |

Table S8. Definitions and occurrence of nephrotoxicity

| Study            | Definition                                                                                                                                                                                 | Intervention group     |       | Control group    |       |
|------------------|--------------------------------------------------------------------------------------------------------------------------------------------------------------------------------------------|------------------------|-------|------------------|-------|
|                  |                                                                                                                                                                                            | Number of events       | Total | Number of events | Total |
| Cardile (2015)   | Defined and graded as acute kidney injury (AKI) via the RIFLE Criteria                                                                                                                     | 23                     | 173   | 20               | 79    |
| Fernandez (1996) | Mild if the increase in creatinine levels was 0.5 to 0.9 mg/dl, moderate if the increase was 1.0 to 2.4 mg/dl, and severe if the increase was 2.5 mg/dl or more                            | 5                      | 37    | 14               | 33    |
| Hirano (2016)    | Vancomycin induced AKI was evaluated based on RIFLE criteria                                                                                                                               | 7                      | 51    | 6                | 28    |
| Irikura (2011)   | The dosing was discontinued because of increase in serum creatinine level                                                                                                                  | 1                      | 21    | 2                | 33    |
| Leu (2012)       | An increase in serum creatinine of 0.5 mg/dl at any time during vancomycin treatment, or a decrease in creatinine clearance over 50% compared to baseline                                  | 4                      | 28    | 11               | 48    |
| Momattin (2015)  | 0.5 mg/dl elevation in serum creatinine (SCr) if the initial value was <3 mg/dl, or a rise of >1 mg/dl if the initial value was >3 mg/dl                                                   | 16                     | 286   | 29               | 278   |
| Welty (1994)     | A rise in serum creatinine concentration of greater than 44 µmol/l (0.5 mg/dL) during vancomycin therapy                                                                                   | 4                      | 61    | 13               | 55    |
| Neely (2018)     | an increase in serum creatinine of ≥ 0.5 mg/dl or ≥ 50% from baseline                                                                                                                      | 0                      | 88    | 6                | 75    |
| Truong (2018)    | AKI was defined as an increase in serum creatinine by ≥ 50% or 0.5 mg/dL, whichever was greater, from baseline for 2 or more consecutive occurrences in accordance with the RIFLE criteria | 4                      | 50    | 7                | 50    |
| Dorajoo (2019)   | 50% or greater increase in serum creatinine                                                                                                                                                | 2                      | 22    | 1                | 21    |
| Finch (2017)     | SCr increase of ≥ 0.5 mg/dl and ≥ 50% the baseline SCr for > 2 consecutive measurements                                                                                                    | 54                     | 734   | 54               | 546   |
| Masuda (2015)    | The incidence of nephrotoxicity was defined as a 50% or higher increase from the baseline Scr level during the period from Initiation of VAN therapy to 72 – 96 hours after administration | OR 0.548 (0.189, 1.59) |       |                  |       |

RIFLE: Risk, Injury, Failure, Loss, ESRD (End Stage Renal Disease)



**Figure S1 Subgroup analysis for individualized dosing via PK tool and attainment of target trough concentration**

**A, Subgroup analysis by mode of individualization**

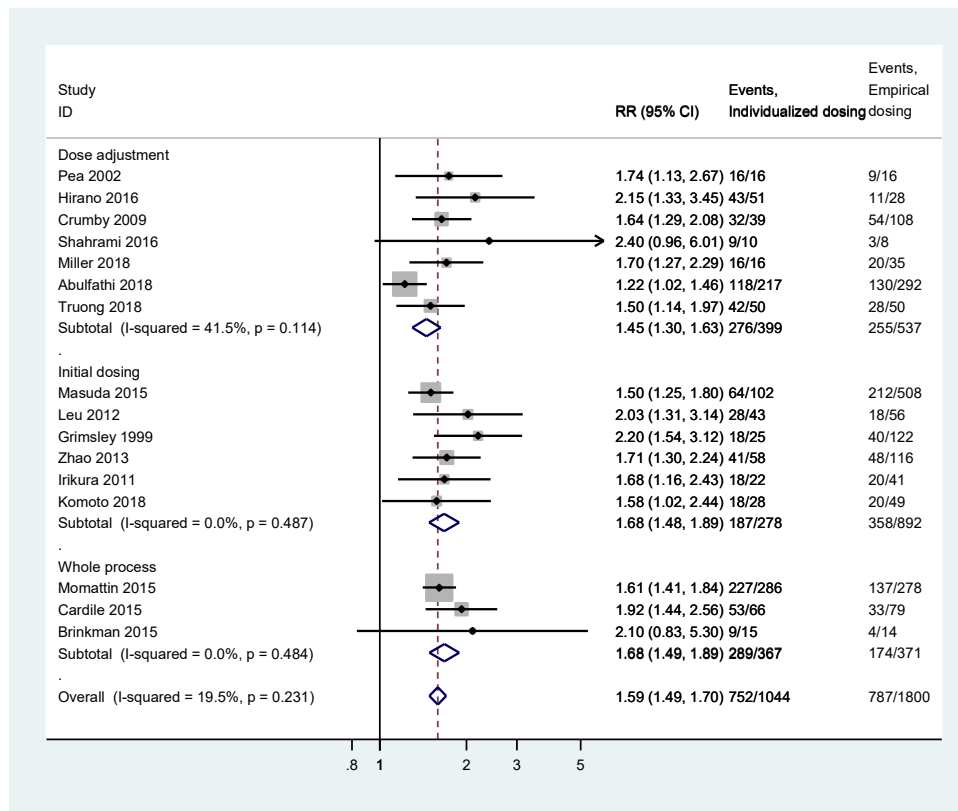

## B, Subgroup analysis by utility of Bayesian forecasting method in dose adjustment

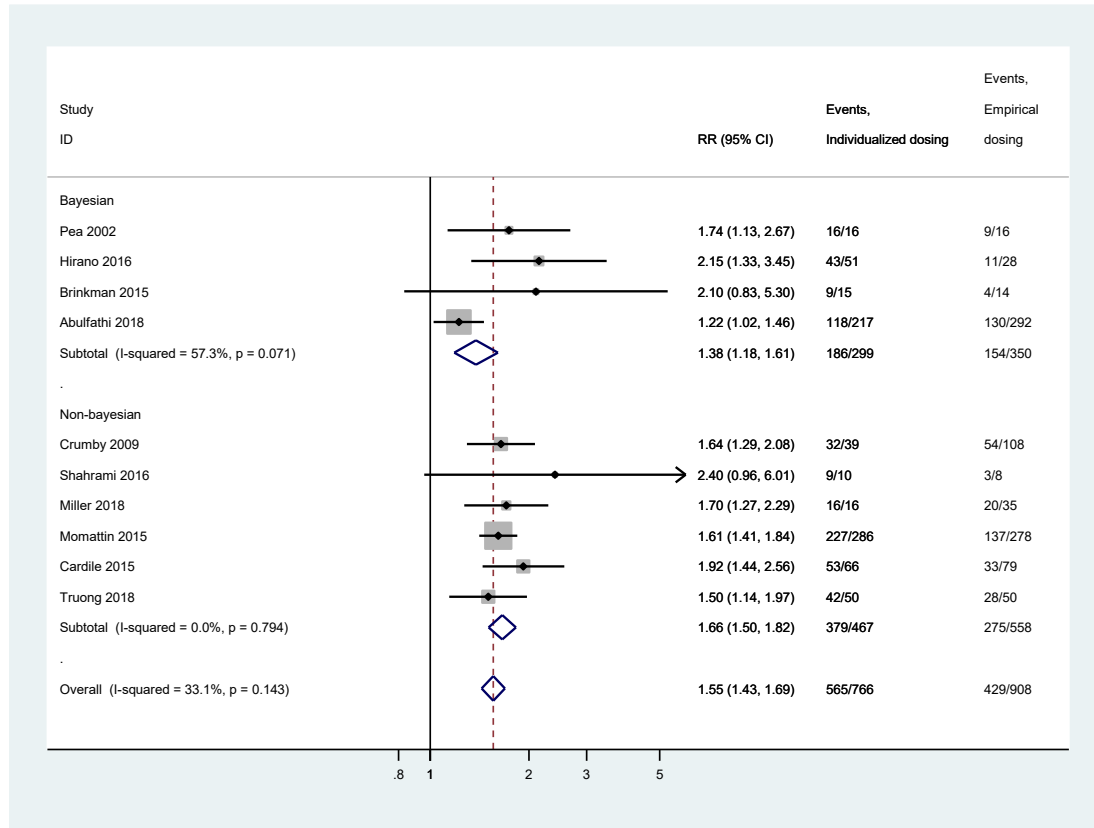

### C, Subgroup analysis by age

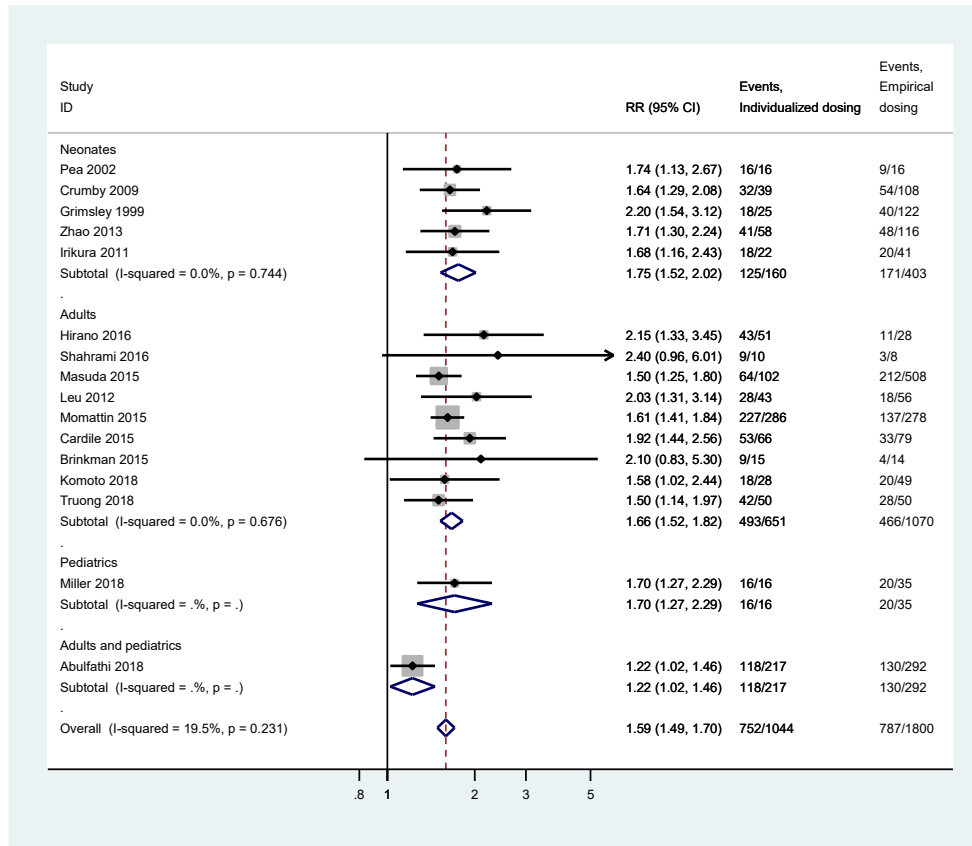

## D, Subgroup analysis by whether patients were critically ill

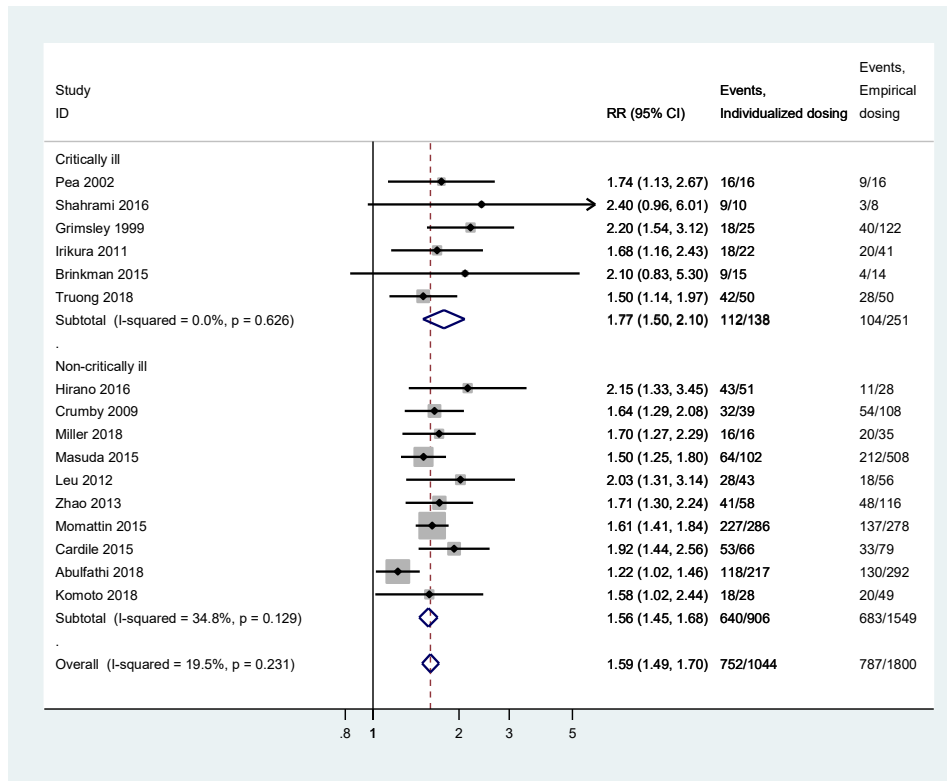

## E, Subgroup analysis by target trough concentration

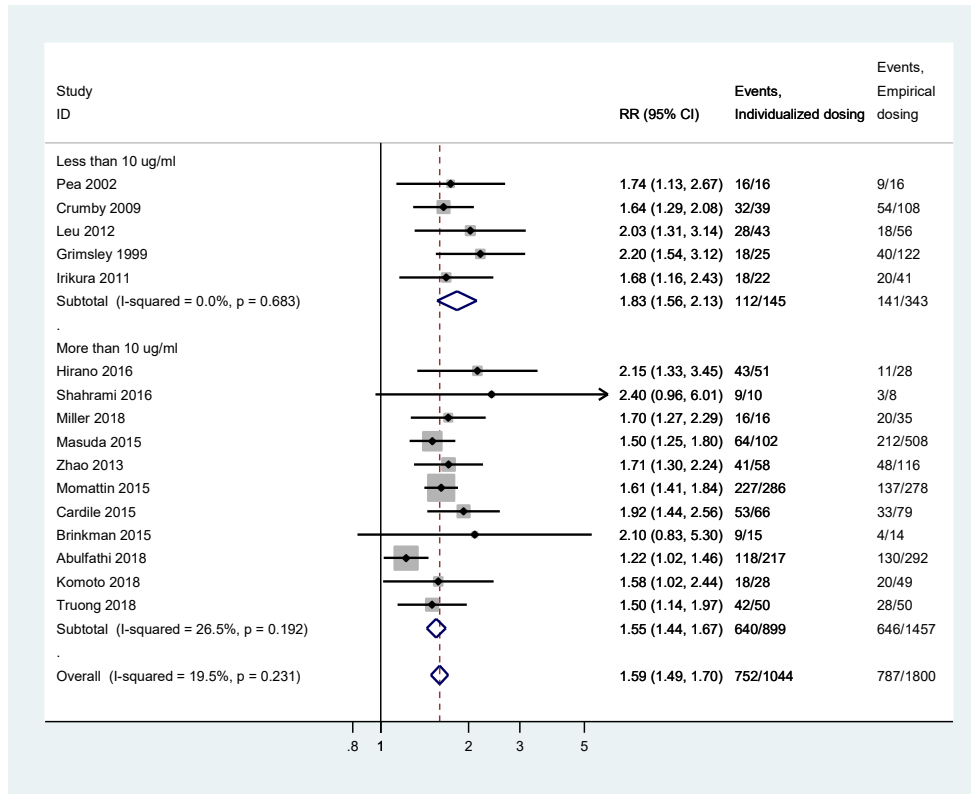

## F, Subgroup analysis by study design

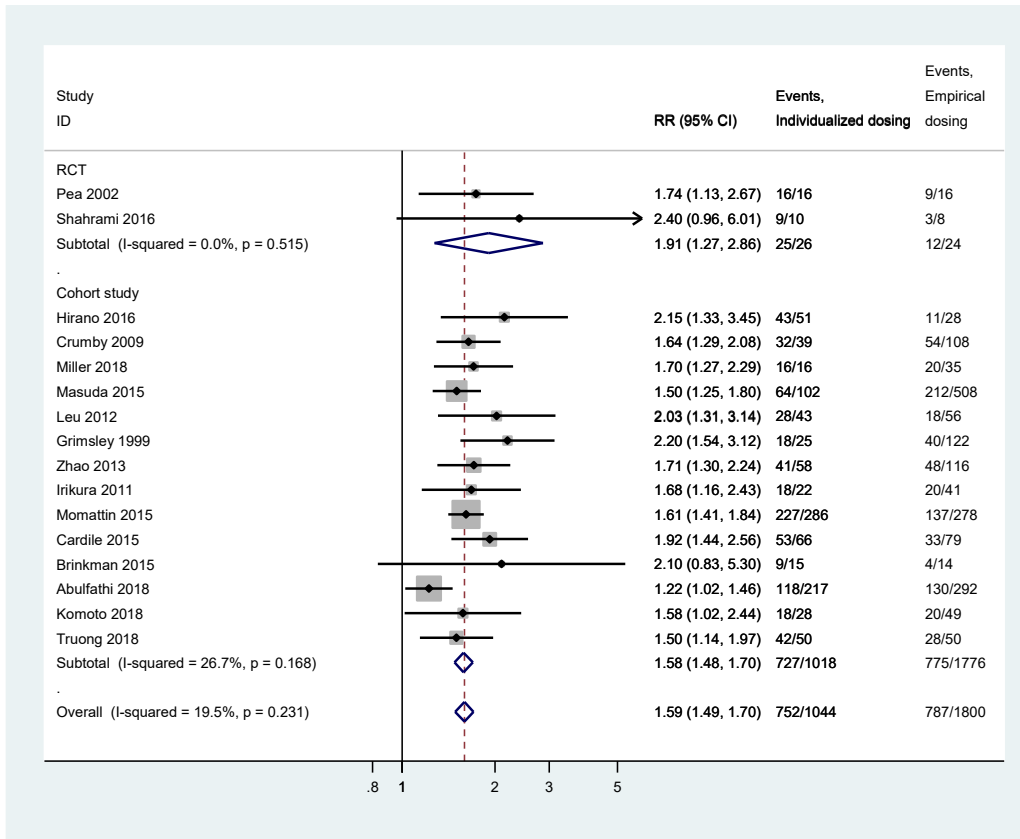

Figure. S2. Sub-analysis of target trough concentration in accordance with guidelines

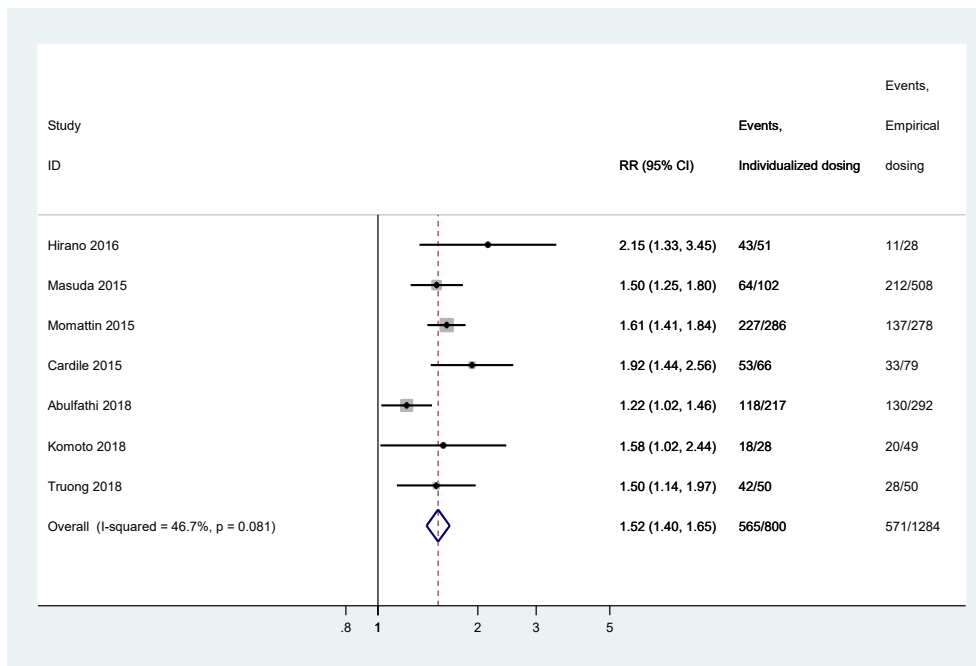

**Figure. S3. Sub-analysis of nephrotoxicity's definition in accordance with guidelines**

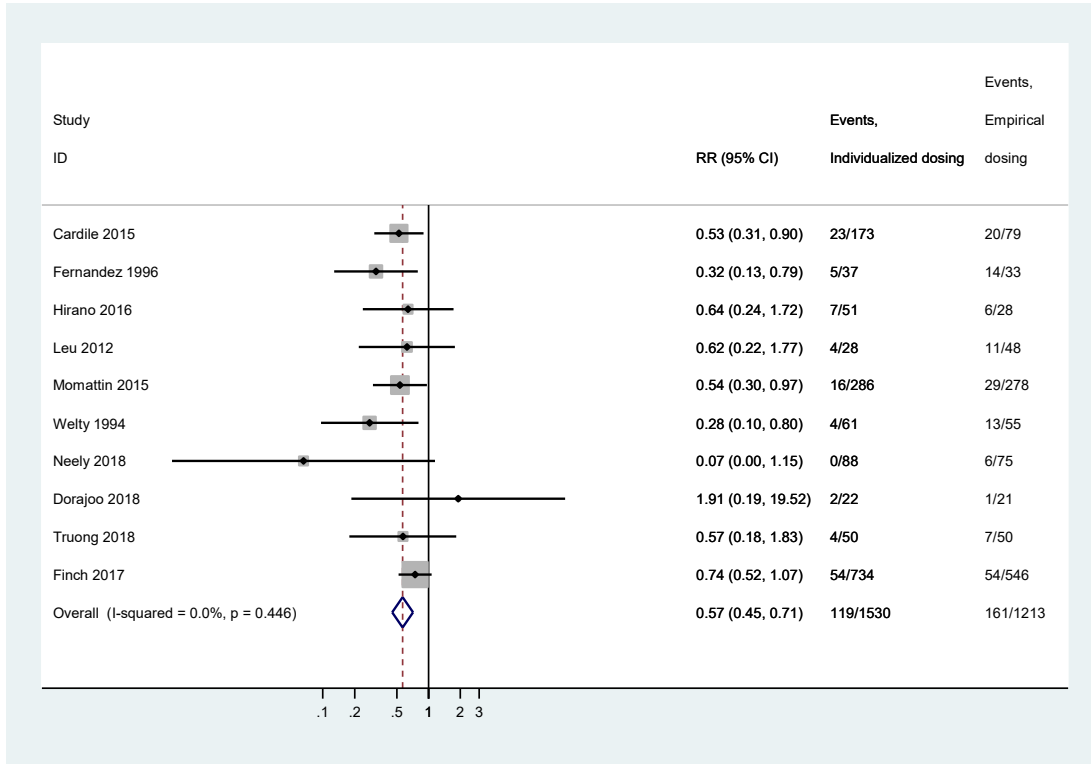

**Figure S4 Meta-analysis for all-cause mortality**

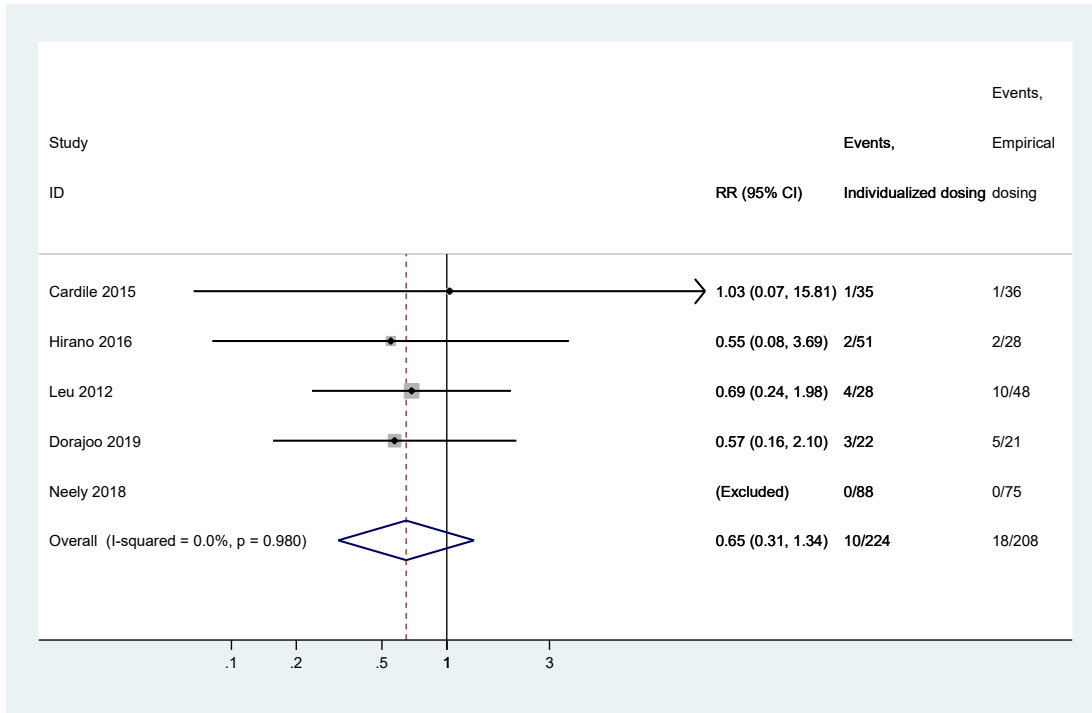

**Figure S5 Meta-analysis for length of hospital-stay**

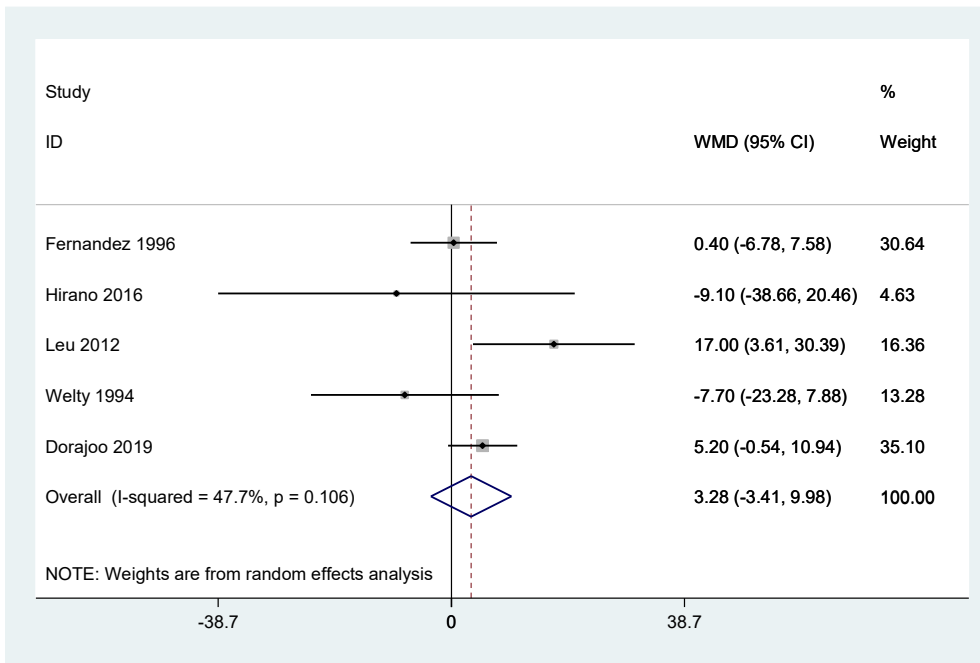



Figure. S6. Sensitivity analysis using function “metaninf”

(A). Attainment of target trough concentration

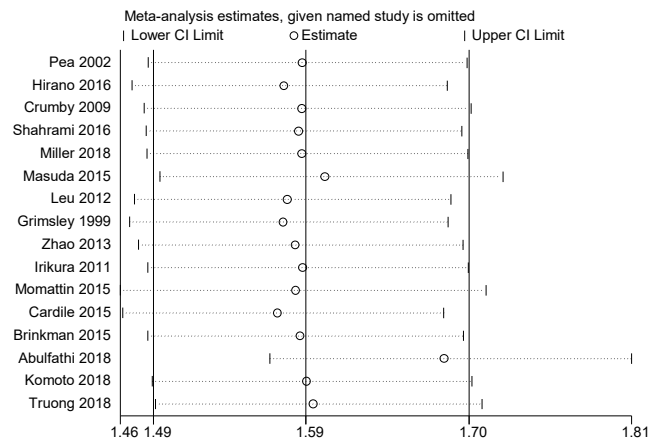

(B). Nephrotoxicity

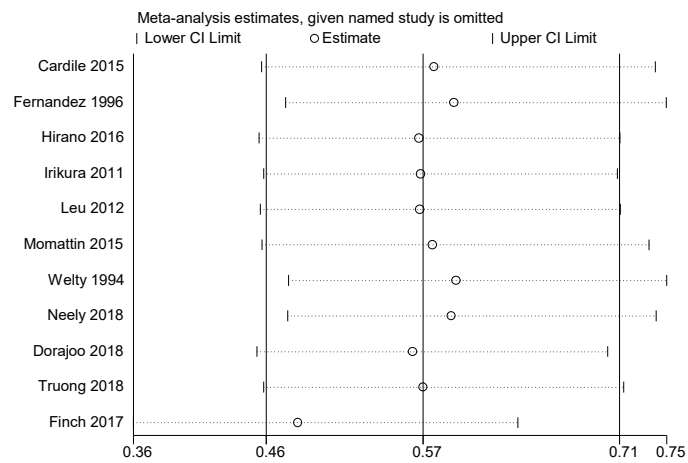

(C). Mortality

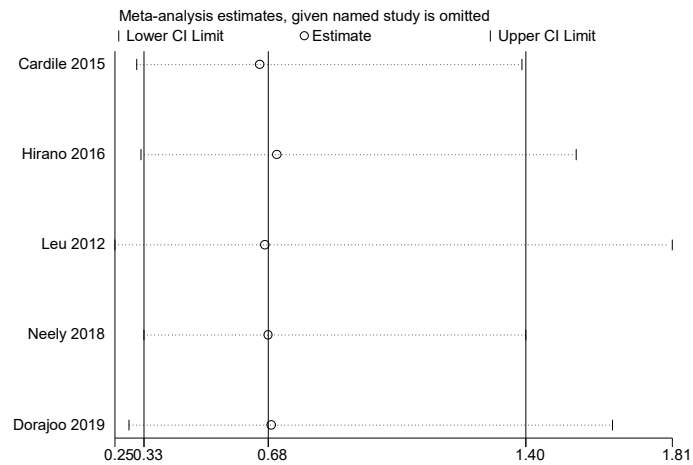

**(D).Length of hospital-stay**

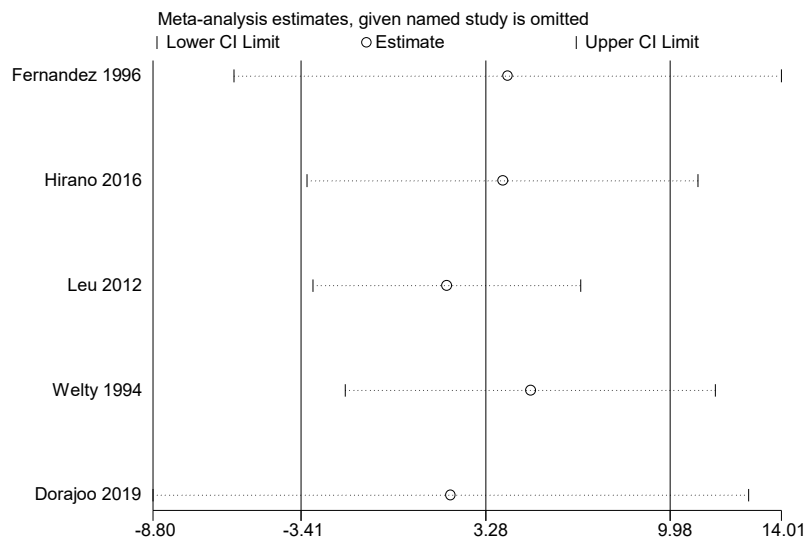

**Figure S7 Funnel plot for publication bias assessment**

**(A). Attainment of target trough concentration**

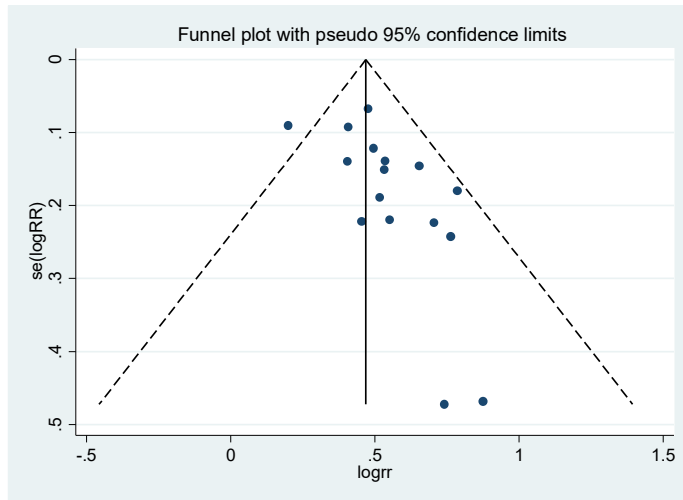

(B) Nephrotoxicity

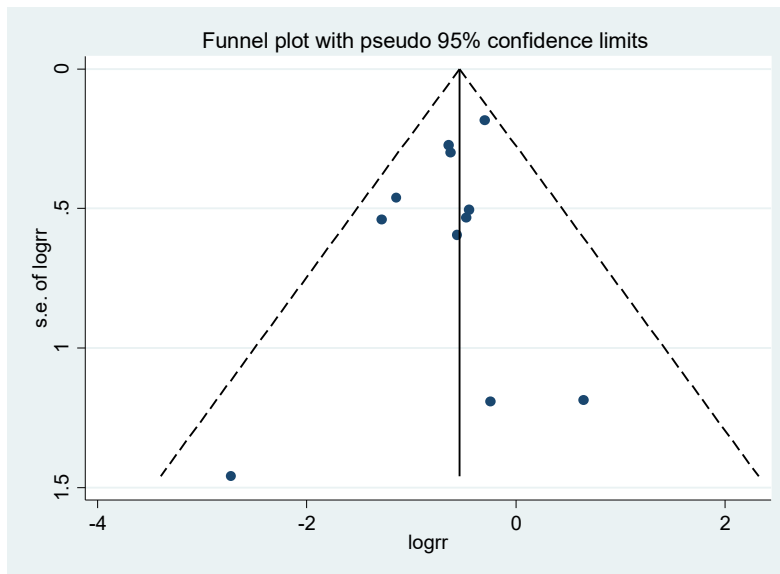

**Figure S8 Egger's test for publication bias assessment**

(A). Attainment of target trough concentration

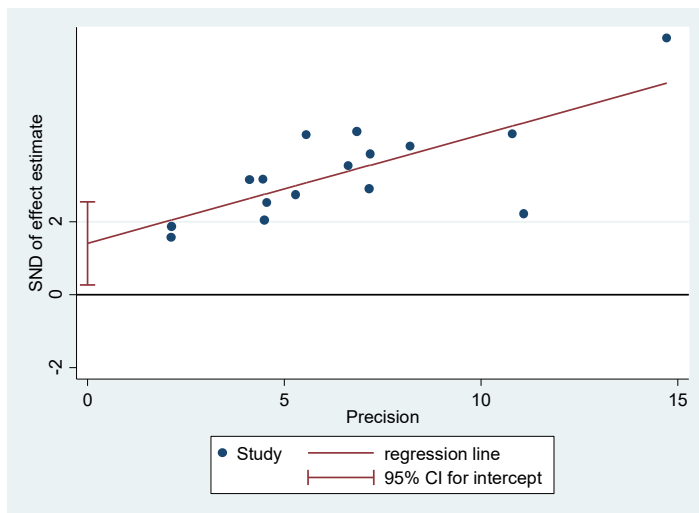

Number of studies = 16

Root MSE = .941

| Std_Eff | Coef.    | Std. Err. | t    | P> t  | [95% Conf. Interval] |          |
|---------|----------|-----------|------|-------|----------------------|----------|
| slope   | .297409  | .0723315  | 4.11 | 0.001 | .1422734             | .4525446 |
| bias    | 1.407992 | .5312744  | 2.65 | 0.019 | .2685222             | 2.547463 |

Test of H0: no small-study effects

P = 0.019

(B). Nephrotoxicity

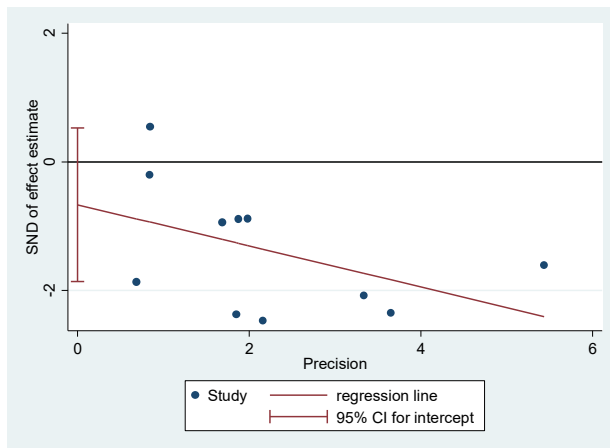

**Eggers test for small -study effects:**

Regress standard normal deviate of intervention effect estimate against its standard error

Number of studies = 11

Root MSE = .9179

| Std_Eff | Coef.     | Std. Err. | t     | P> t  | [95% Conf. Interval] |          |
|---------|-----------|-----------|-------|-------|----------------------|----------|
| slope   | -.3199546 | .2032505  | -1.57 | 0.150 | -.7797392            | .1398301 |
| bias    | -.6662212 | .528091   | -1.26 | 0.239 | -1.860846            | .5284037 |

Test of H0: no small-study effects P = 0.239

**Figure S9 Trim and fill analysis for attainment of target trough concentration**

**Filled funnel plot**

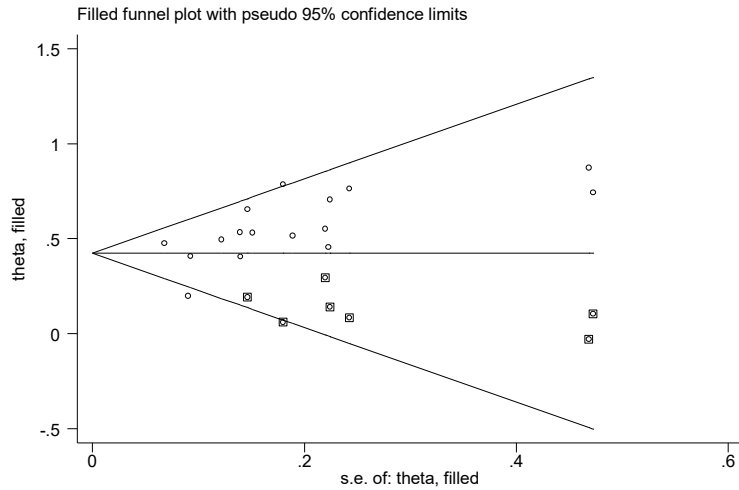

### Meta-analysis

| Method | Pooled Est | 95% CI |       | Asymptotic z_value | Asymptotic p_value | No. of studies |
|--------|------------|--------|-------|--------------------|--------------------|----------------|
|        |            | Lower  | Upper |                    |                    |                |
| Fixed  | 0.469      | 0.403  | 0.536 | 13.788             | 0.000              | 16             |
| Random | 0.484      | 0.404  | 0.565 | 11.851             | 0.000              |                |

Test for heterogeneity:  $Q = 18.616$  on 15 degrees of freedom ( $p = 0.232$ )  
 Moment-based estimate of between studies variance = 0.005

Trimming estimator: Linear

Meta-analysis type: Fixed-effects model

| iteration | estimate | Tn  | # to trim | diff |
|-----------|----------|-----|-----------|------|
| 1         | 0.469    | 111 | 6         | 136  |
| 2         | 0.427    | 122 | 7         | 22   |
| 3         | 0.423    | 123 | 7         | 2    |
| 4         | 0.423    | 123 | 7         | 0    |

Filled

Meta-analysis (exponential form)

| Method       | Pooled Est   | 95% CI       |              | Asymptotic z_value | Asymptotic p_value | No. of studies |
|--------------|--------------|--------------|--------------|--------------------|--------------------|----------------|
|              |              | Lower        | Upper        |                    |                    |                |
| <b>Fixed</b> | <b>1.527</b> | <b>1.436</b> | <b>1.624</b> | <b>13.441</b>      | <b>0.000</b>       | <b>23</b>      |
| Random       | 1.534        | 1.412        | 1.668        | 10.080             | 0.000              |                |

---

Test for heterogeneity:  $Q= 32.273$  on 22 degrees of freedom ( $p= 0.073$ )

Moment-based estimate of between studies variance = 0.011
